1 **Transitioning between preparatory and precisely sequenced neuronal activity in production of a skilled**  
2 **behavior**

3

4 **Vamsi K. Daliparthi<sup>1</sup>, Ryosuke O. Tachibana<sup>2</sup>, Brenton G. Cooper<sup>3</sup>, Richard H.R. Hahnloser<sup>4,5</sup>, Satoshi Kojima<sup>6</sup>,**  
5 **Samuel J. Sober<sup>7</sup>, and Todd F. Roberts<sup>1, #</sup>**

6 <sup>1</sup>Department of Neuroscience, UT Southwestern Medical Center, Dallas, TX, USA

7 <sup>2</sup>Department of Life Sciences, The University of Tokyo, Tokyo, Japan

8 <sup>3</sup>Department of Psychology, Texas Christian University, Fort Worth, TX, USA

9 <sup>4</sup>Institute of Neuroinformatics, University of Zurich/ETH Zurich, Zurich, 8057 Switzerland

10 <sup>5</sup>Neuroscience Center Zurich, Zurich, 8057 Switzerland

11 <sup>6</sup>Department of Structure & Function of Neural Network, Korea Brain Research Institute, Korea

12 <sup>7</sup>Department of Biology, Emory University, Atlanta, GA, USA

13 <sup>#</sup>Correspondence should be addressed to TFR ([Todd.Roberts@utsouthwestern.edu](mailto:Todd.Roberts@utsouthwestern.edu))

14

15

16 **ABSTRACT**

17 Precise neural sequences are associated with the production of well-learned skilled behaviors. Yet, how neural  
18 sequences arise in the brain remains unclear. In songbirds, premotor projection neurons in the cortical song nucleus  
19 HVC are necessary for producing learned song and exhibit precise sequential activity during singing. Using cell-type  
20 specific calcium imaging we identify populations of HVC premotor neurons associated with the beginning and ending  
21 of singing-related neural sequences. We discovered neurons that bookend singing-related sequences and neuronal  
22 populations that transition from sparse preparatory activity prior to song to precise neural sequences during singing.  
23 Recordings from downstream premotor neurons or the respiratory system suggest that pre-song activity may be  
24 involved in motor preparation to sing. These findings reveal population mechanisms associated with moving from  
25 non-vocal to vocal behavioral states and suggest that precise neural sequences begin and end as part of orchestrated  
26 activity across functionally diverse populations of cortical premotor neurons.

## 27 INTRODUCTION

28 The sequential activation of neurons is implicated in a wide variety of behaviors, ranging from episodic memory  
29 encoding and sensory processing to the voluntary production of skilled motor behaviors<sup>1-10</sup>. Neural sequences  
30 develop through experience and have been described in several brain areas, including the motor cortex,  
31 hippocampus, cerebellum, and the basal ganglia<sup>3,7,11-20</sup>. Although computational models provide important insights  
32 into circuit architectures capable of sustaining sequenced activity<sup>9,10,20-24</sup>, our understanding of sequence initiation  
33 and termination is still limited.

34

35 The precise neural sequences associated with birdsong provide a useful biological model for examining this issue.  
36 Premotor projection neurons in the cortical vocal region HVC (HVC<sub>RA</sub> neurons, see legend Figure 1 for anatomical  
37 abbreviations) exhibit precise sequential activity during song and current evidence suggests that this activity is  
38 acutely necessary for song production<sup>1,25-28</sup>. HVC<sub>RA</sub> neurons are thought to be exclusively active during vocal  
39 production, yet ~50% of recorded HVC<sub>RA</sub> neurons do not exhibit any activity during singing<sup>1,6,27-29</sup>, leaving the function  
40 of much of this circuit unresolved. To examine the neural mechanisms associated with the initiation and termination  
41 of singing we imaged from populations of HVC<sub>RA</sub> neurons in freely singing birds.

42

43 Motor planning and preparation activity are associated with accurate production of volitional motor movements<sup>8,30</sup>  
44 but are poorly described in the context of precise neural sequences or in the production of song. Here we show that  
45 ~50% of HVC<sub>RA</sub> neurons are active during periods associated with preparation to sing and recovery from singing. One  
46 population is only active immediately preceding and following song production, but not during either singing or non-  
47 vocal behaviors. A second population of neurons exhibits ramping activity before and after singing and can also  
48 participate in precise neural sequences during song performance. Recordings from downstream neurons in the  
49 motor cortical nucleus RA reveal neural activity prior to song initiation and during song termination. The control of  
50 respiratory timing is essential for song<sup>31</sup>, and our measurements of respiratory activity suggest that pre-singing  
51 activity in HVC<sub>RA</sub> neurons functions to coordinate changes in respiration necessary for song initiation. From these  
52 findings, we argue that subpopulations in HVC encode the neural antecedents of song that drive recurrent pathways  
53 through the brainstem to prepare the motor periphery for song production.

54

## 55 RESULTS

### 56 Activity Sequences in Populations of HVC<sub>RA</sub> Neurons

57 We used miniscope calcium imaging to examine the activity of populations of HVC<sub>RA</sub> neurons in singing zebra  
58 finches<sup>32,33</sup>. A total of 223 HVC<sub>RA</sub> neurons were imaged during production of 1,298 song syllables from 6 birds (30  
59 song phrases across 18 imaging trials, **EDTable 1**). To selectively target HVC<sub>RA</sub> neurons, we combined retrograde viral  
60 expression of cre recombinase from injections into RA with viral expression of cre-dependent GCaMP6s from  
61 injections into HVC (**Figure 1a-b and legend, see Methods**)<sup>33</sup>. We confirmed the identity of imaged neurons using

62 conventional retrograde tracing, anatomical measures of neuronal features, and post-hoc histological verification.  
 63 We found that this approach exclusively and uniformly labeled populations of HVC<sub>RA</sub> neurons (**Figure 1c-f**).  
 64  
 65 To elicit courtship singing, we presented male birds with a female and imaged HVC<sub>RA</sub> neurons during song  
 66 performance (**EDVideo 1**). Given the slow decay times of calcium signals relative to singing behavior, we defined  
 67 neuronal activity by the rise times of calcium events that were >3 standard deviations (SD) above baseline (**Figure 1g**,  
 68 average rise time:  $0.112 \pm 0.047$  s SD, **see Methods**). The activity of individual HVC<sub>RA</sub> neurons was time-locked to a  
 69 moment in the birds' song, with different neurons active at different moments in the song motif (**Figure 1g-h**; onset  
 70 jitter =  $55.0 \pm 60.9$  ms, populations imaged at 30 frames per second). We found that the sequential activity of HVC<sub>RA</sub>  
 71 neurons roughly coded for all moments in the song motif (**Figure 1h**). These results provide the first glimpse of  
 72 activity across populations of identified HVC<sub>RA</sub> neurons during singing and support the idea that sparse and precise  
 73 neuronal sequences underlie the sequential structure of birdsong<sup>1,6,27,34,35</sup>.  
 74

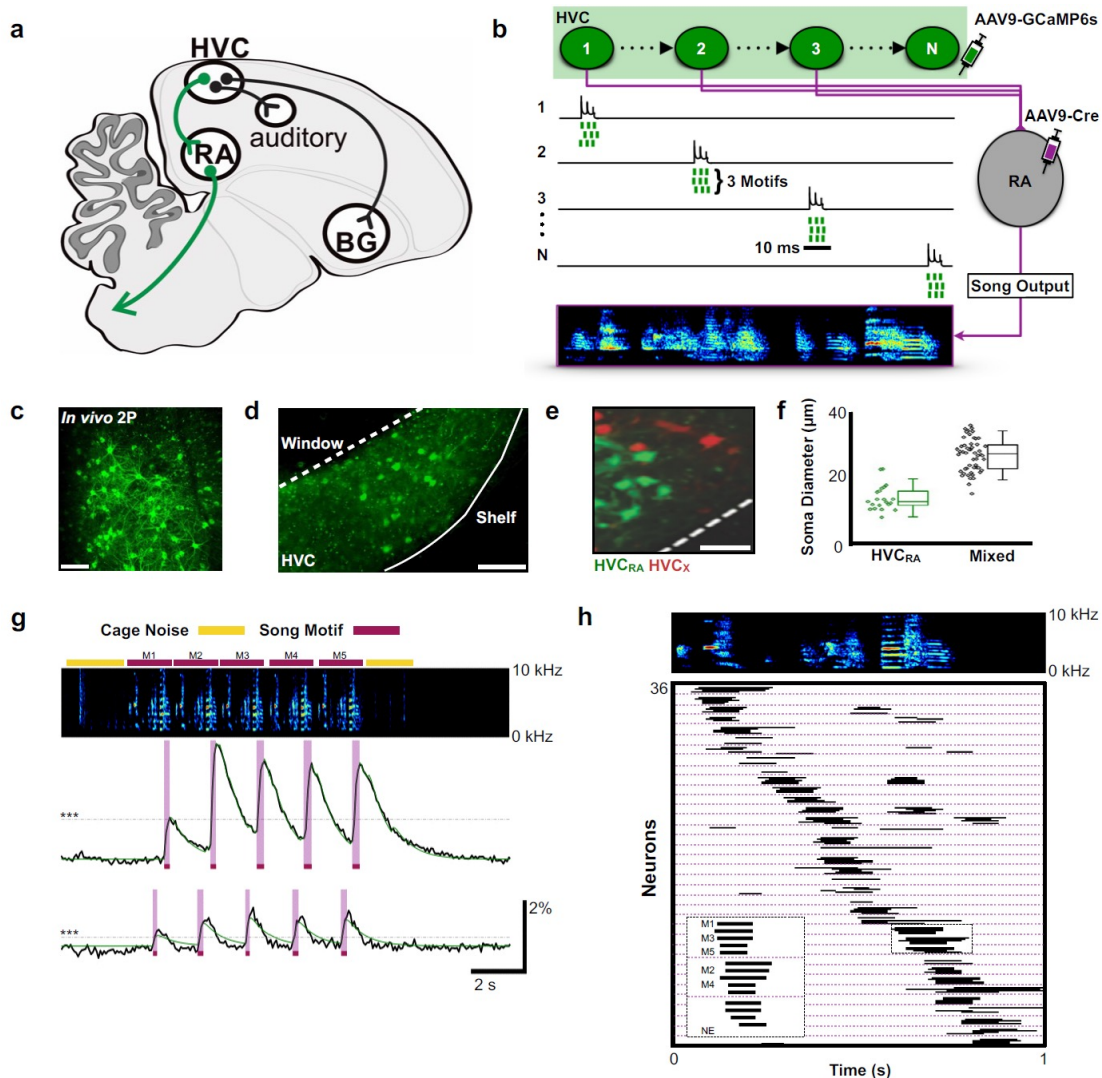

75

76 **Figure 1. Population imaging of song-related HVC<sub>RA</sub> sequences.** **a)** Diagram showing 3 distinct projection neuron targets of the  
77 vocal premotor nucleus HVC. The projection neurons connecting HVC to the downstream motor nucleus RA (HVC<sub>RA</sub> neurons) are  
78 shown in green. Basal ganglia (BG), robust nucleus of the arcopallium (RA), nucleus HVC of the nidopallium (HVC). **b)** Schematic  
79 showing HVC<sub>RA</sub> neuron somata (green) and their outputs (magenta) to the downstream motor nucleus RA. AAV9-Flex-CAG-  
80 GCaMP6s was injected into HVC (green syringe) and AAV9-CAG-Cre was injected into RA (magenta syringe) to selectively label  
81 HVC<sub>RA</sub> neurons. **c)** In vivo two-photon maximum density projection of retrogradely labeled HVC<sub>RA</sub> neurons expressing GCaMP6s.  
82 Scale bar = 100  $\mu$ m. **d)** A cross-section of HVC showing GCaMP6s-labeled HVC<sub>RA</sub> neurons (green). The dashed line indicates where  
83 the cranial window was made over HVC. Note the lack of labeling in the region directly ventral of HVC, known as the HVC shelf.  
84 Scale bar = 100  $\mu$ m. **e)** A sagittal section of HVC showing HVC<sub>RA</sub> neurons (green) and retrogradely labeled HVC<sub>X</sub> neurons (red). The  
85 dashed line indicates the border between HVC and HVC shelf. Scale bar = 50  $\mu$ m. **f)** Whisker and scatter plots of soma diameters  
86 of GCaMP6s expressing cells show that retrogradely labeled HVC<sub>RA</sub> neurons (green) have smaller diameters than neurons labelled  
87 using only direct viral injections into HVC (mixed population neurons, black). Boxes depict 25<sup>th</sup> and 75<sup>th</sup> percentiles, whiskers  
88 depict SD. HVC<sub>RA</sub>: N=21 neurons; mean diameter = 14.0  $\pm$  3.8  $\mu$ m (SD); Mixed: N=52 neurons; mean=26.9  $\pm$  4.9  $\mu$ m;  $t = -10.7$ ,  $p =$   
89  $2.0 \times 10^{-16}$ , two-sample  $t$  test. **g)** Example calcium traces from 2 HVC<sub>RA</sub> neurons in a bird that sang 5 consecutive motifs. Shown  
90 are the background-subtracted traces (black) and the inferred calcium traces (green). The magenta overlays indicate the rise  
91 periods (intervals between onset and peak times) of the recorded calcium transients. The horizontal dashed line (gray) denotes 3  
92 SD above baseline activity. The bars above the spectrogram denote cage noise associated with birds hopping or flapping their  
93 wings (yellow) or production of song motifs (red). **h)** Motif-related activity of 36 HVC<sub>RA</sub> neurons across 5 motifs. Each row shows  
94 activity of a neuron from 1 trial. The dashed magenta lines separate different neurons. Empty spaces indicate trials wherein  
95 neurons were not active (no event, NE). The inset shows a zoom-in of activity from 3 separate HVC<sub>RA</sub> neurons.  
96

### 97 **Peri-Song Activity in Populations of HVC<sub>RA</sub> Neurons**

98 The sequence of syllables in zebra finch song is stereotyped and unfolds in less than a second. Like other rapid and  
99 precise motor movements, song may benefit from motor planning and preparatory activity; however, HVC<sub>RA</sub> neurons  
100 have been hypothesized to exclusively represent temporal sequences for songs and calls, and to remain quiescent at  
101 all other times<sup>1,5,6,28,29,34</sup>. To scrutinize this prediction, we examined the activity of HVC<sub>RA</sub> neurons prior to song onset,  
102 in between song bouts, and immediately after singing (**Figure 2a-c, EDFig. 1**, song onset defined as the beginning of a  
103 song-phrase, including introductory notes; see **Methods** for detailed definitions of phrases, song, and peri-song  
104 behavior). For any given song phrase, we observed significant activity surrounding singing behavior, refuting the  
105 hypothesis that HVC<sub>RA</sub> neuronal activity is restricted to periods of active song production. 30 out of 30 song phrases  
106 from 6 birds exhibited 'peri-song' activity, defined as the 5 second intervals before and after singing, plus silent gaps  
107 within song phrases. Slightly fewer HVC<sub>RA</sub> neurons were active during peri-song intervals (54.3% of neurons) than  
108 during singing (59.9%), ( $t = -1.1$ ,  $p = 0.29$  two-sample  $t$  test; **Figure 2b**). Of the neurons that were active during peri-  
109 song intervals, 40.6% were active prior to song onset, 17.8% were active following song offset, and 41.6% were active  
110 before and after song (N=197 neurons, 6 birds, **EDFig. 2**). When we examined the timing of peri-song events, we  
111 found no correlation in the timing of pre-song and post-song event onsets in neurons that were sparsely both before  
112 and after song (**EDFig. 3**). Although neuronal populations displayed considerably more calcium events during song ( $t$   
113  $= 5.635$ ,  $p = 5.65 \times 10^{-7}$  two-sample  $t$ , normalized song event rate = 24.09 events/s  $\pm$  15.95 SD, normalized peri-song  
114 event rate = 6.97 events/s  $\pm$  3.72 SD), a substantial fraction of all recorded calcium events occurred within the 5  
115 second intervals before or after song (997/2366 or 32.5% of all calcium events).

116

117 To better characterize these newly discovered activity profiles, we indexed the song and peri-song activity of all  
118 HVC<sub>RA</sub> neurons throughout a day of singing (phrase index: range -1 to +1, with neurons exclusively active outside of  
119 singing scoring -1 and neurons active only during singing +1, **Figure 2c-d, see Methods**). We found that HVC<sub>RA</sub> phrase  
120 indices were not uniformly distributed ( $\chi^2$  (7, N = 223) = 46.3,  $p = 7.6 \times 10^{-8}$ , Chi-square goodness of fit test), with a  
121 significant fraction (36%) falling at the extremes of this scale (**Figure 2d**), and that neurons with different phrase  
122 indices were anatomically intermingled throughout HVC (**EDFig. 4**). Most neurons (64.1%) displayed sparse  
123 heterogenous activity during peri-song periods and transitioned to temporally precise activity during singing  
124 (referred to here as ‘**pan-song neurons**’; **EDFig. 5**). At the extremes of the phrase index scale (phrase indices -1 or  
125 +1), we found that 18.4% of neurons were exclusively active during peri-song intervals (phrase index = -1, referred to  
126 here as ‘**peri-song neurons**’), while 17.5% participated exclusively in neural sequences during singing (phrase index =  
127 +1, referred to here as ‘**song neurons**’).

128

129 These results provide a starkly different view of HVC<sub>RA</sub>’s potential contribution to behavior, revealing that a  
130 substantial portion of this network can be active outside of the precise neuronal sequences associated with song.  
131 One interpretation is that HVC<sub>RA</sub> neurons may play a role in motor planning and in preparation to sing. That more  
132 than half of all HVC<sub>RA</sub> neurons can be active during peri-song intervals also raises the prospect that precise neural  
133 sequences emerge as part of changing network dynamics across subpopulations of HVC<sub>RA</sub> neurons. Lastly, these  
134 results lend insight into why approximately half of HVC<sub>RA</sub> neurons recorded using electrophysiological methods  
135 appear to be inactive during song. Nonetheless, this result also raises questions as to why previous studies have not  
136 identified peri-song activity. First, previous calcium imaging experiments have not restricted GCaMP expression to  
137 HVC<sub>RA</sub> neurons, but rather relied on either non-selective labeling of neuronal populations in HVC<sup>4,34,36,37</sup> or have been  
138 restricted to imaging small populations of other classes of HVC neurons<sup>38</sup>. Second, electrophysiological studies of  
139 identified HVC<sub>RA</sub> neurons have been mostly confined to recording one neuron at a time and these experiments have  
140 focused on understanding coding during song production, often using short (~500 ms) buffering windows triggered  
141 by singing behavior. Therefore, sparse heterogenous activity occurring seconds before or after song could be simply  
142 overlooked or could appear irrelevant unless viewed through the lens of population dynamics. Consistent with this  
143 idea, previous multi-unit recordings in zebra finches and mockingbirds, which are dominated by activity of  
144 interneurons or neurons projecting to the basal ganglia, have identified ‘anticipatory’ activity in HVC hundreds of  
145 milliseconds prior to song onset, but the role of this activity and whether HVC<sub>RA</sub> neurons are active prior to song  
146 onset have not been examined<sup>39-41</sup>.

147

148 Another possibility is that peri-song activity is unrelated to singing and merely reflects low levels of spontaneous  
149 activity intrinsic to HVC<sub>RA</sub> neurons. This was not the case, however, as HVC<sub>RA</sub> neurons were largely inactive outside of  
150 pan-song intervals and were significantly more active during the peri-song periods than baseline (baseline calculated

151 from periods  $\geq 10$  s removed from periods of singing or calling,  $p = 8.4 \times 10^{-5}$ , Chi-square = 18.78 Friedman test,  
152 baseline =  $12.9\% \pm 5.7$  SD of fluorescence values normalized to song, pre-song =  $26.9\% \pm 14.7$ , and post-song =  $30.2\%$   
153  $\pm 10.7$ ). In addition, we examined the amplitudes of peri-song calcium events and found that they were larger than  
154 events occurring during song ( $t = 3.2769$ ,  $p = 0.0012$ , two-tailed  $t$  test, 279 fluorescence peaks measured from  
155 neurons active during both peri-song and song, pan-song neurons with phrase indices between  $-0.18$  to  $0.18$ ). We  
156 also asked whether peri-song activity might relate to factors other than singing. We examined trials in which birds did  
157 not sing to female birds but found no HVC<sub>RA</sub> neuron that responded solely to presentation of the female or during  
158 non-song related movements of the head, beak, or throat, such as during eating, grooming, and seed-shelling (**Figure**  
159 **2e, EDFig. 6**). Indeed, our populations of HVC<sub>RA</sub> neurons only became substantially active prior to singing or calling.  
160 Moreover, we found peri-song activity in the moments before and after undirected song bouts produced in isolation  
161 (**EDFig. 6 - 7**), suggesting that peri-song activity is unlikely to be solely associated with extraneous courtship behaviors  
162 such as courtship dance.

163

164 We next examined the possibility that HVC<sub>RA</sub> neurons play a role in motor planning or preparation as birds prepare to  
165 sing. We found pre-song activity in 28/30 song phrases analyzed. In the two instances when we did not detect any  
166 pre-song activity, less than 6 HVC<sub>RA</sub> neurons were active within our imaging window during singing, indicating that  
167 the lack of activity was likely the result of under sampling from the population. Electrophysiological recordings in  
168 young zebra finches have identified HVC neurons that mark the onset of song bouts<sup>5</sup>, ‘bout neurons’ that burst  
169 immediately prior to vocalizations. The vast majority of pre-song activity we describe occurs hundreds of milliseconds  
170 to seconds prior to vocalizations, suggesting a role in planning or preparation to vocalize (96.2% of calcium events  
171 occurred more than 100 ms prior to vocal onset and 65.6% occurred more than 1 second prior to vocal onset). Zebra  
172 finches often sing a variable number of introductory notes prior to the first song motif of a song bout. Pre-song  
173 activity (prior to introductory notes) could be related to the number of introductory notes to be sung, but we found  
174 no correlation between pre-song event rates and the number of introductory notes (**EDFig. 8**). In 27/28 song phrases  
175 we found increases in population activity greater than 3 SDs above baseline predicted song onset within the  
176 following 4-5 seconds ( $2.44$  s  $\pm 1.0$  s SD, 28 song phrases from 5 birds). Calcium activity reached two-thirds of the  
177 maximum pre-song activity only prior to song onset or prior to short vocalizations (**EDFig. 9**). Together, these results  
178 indicate that HVC<sub>RA</sub> neuron activity is predictive of the voluntary production of courtship song and suggests a role for  
179 this network in motor planning and in preparation to sing.



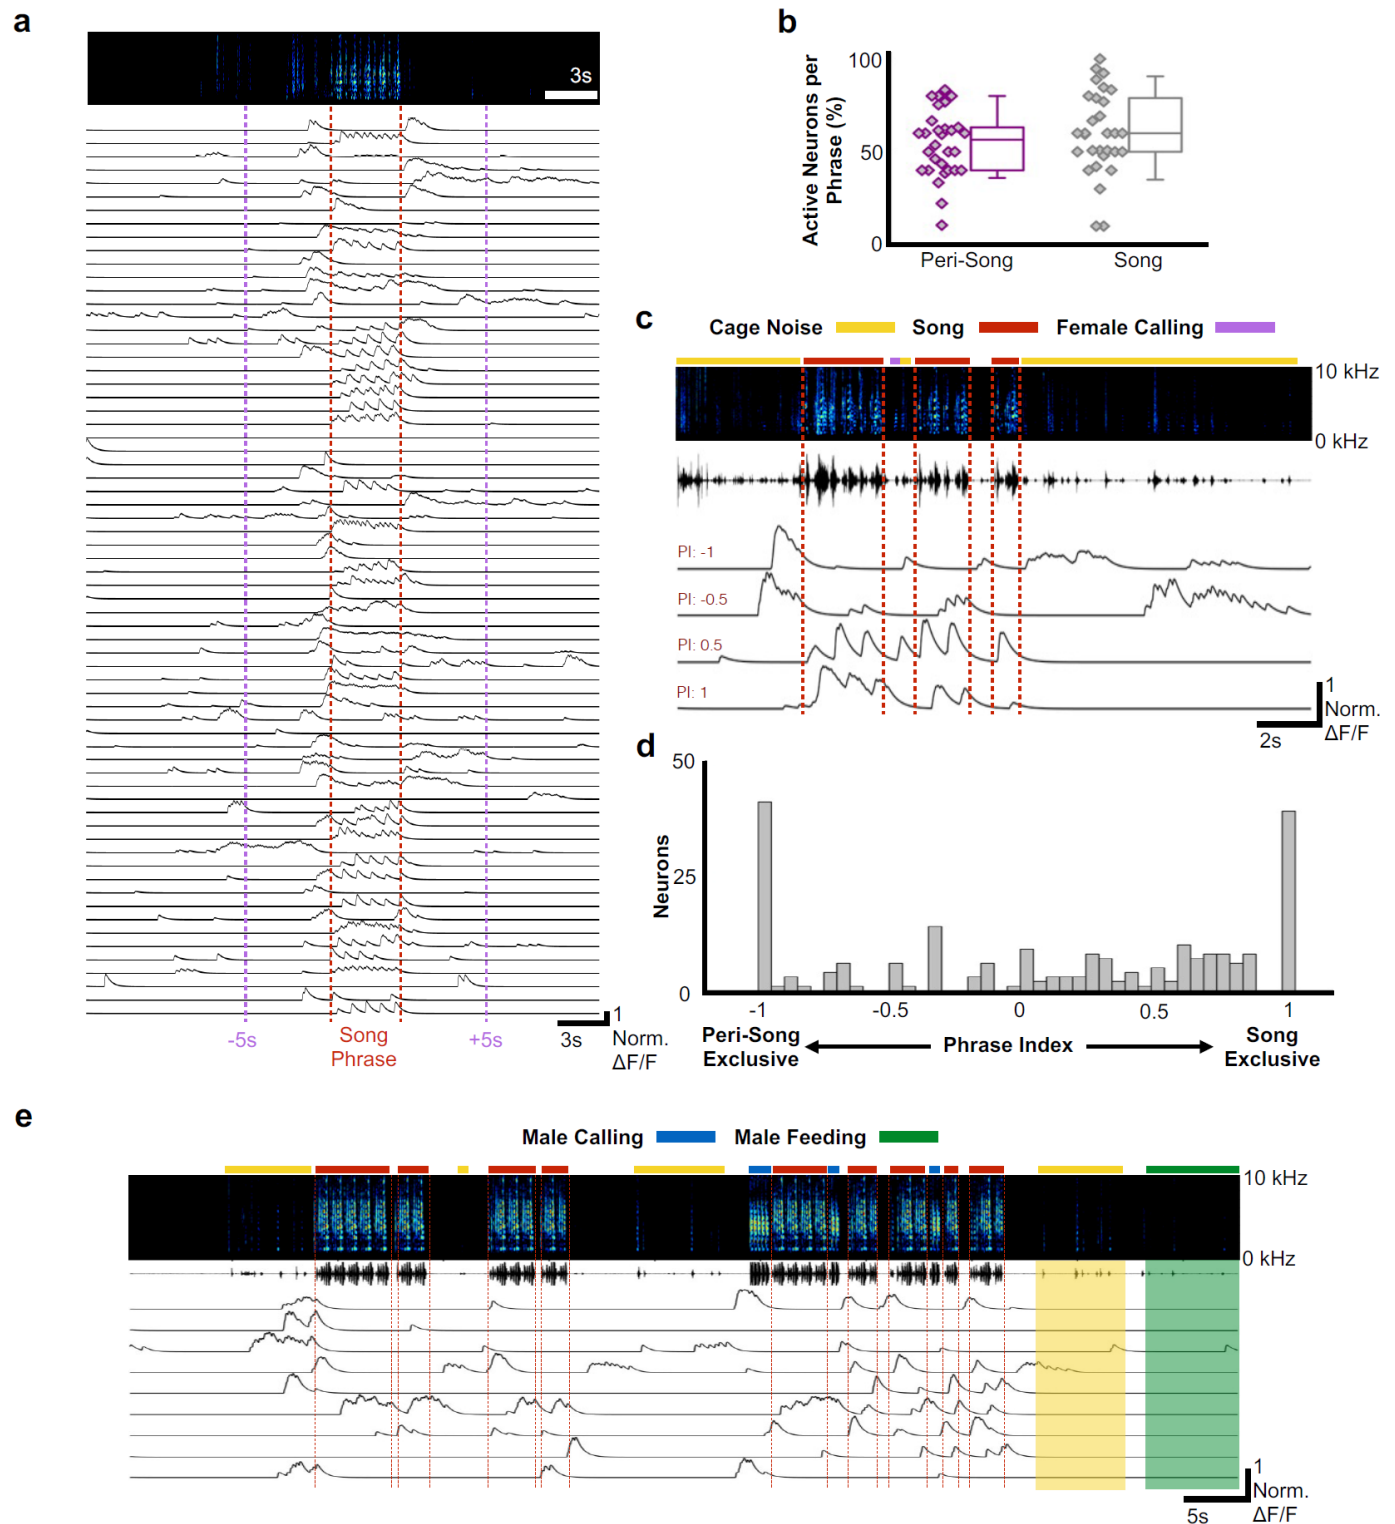

180

181 **Figure 2. Most HVC<sub>RA</sub> neurons exhibit peri-song activity. a)** Normalized calcium transients from 67 simultaneously recorded  
 182 HVC<sub>RA</sub> neurons during production of a song phrase. The red dashed lines delimit 5 consecutive motifs. **b)** Percentages of active neurons during peri-song ( $54.3 \pm 17.8\%$ , SD, purple) and song ( $59.9 \pm 22.5\%$ , gray) are similar (30 phrases,  $t = -1.1$ ,  $p = 0.29$   
 183 paired two-sample  $t$  test). Box plots show the median, 25<sup>th</sup> and 75<sup>th</sup> percentiles with whiskers showing  $\pm 1.5$  IQR. **c)** Sample  
 184 neurons with diverse phrase indices ranging from -1 to 1 and their corresponding calcium traces during 6 motifs over 3 bouts. Dashed lines indicate bout onsets and offsets. Bars above spectrogram indicate the presence of cage noise related to hopping  
 185 and wing flapping (yellow) or female calling (FC, blue). **d)** Histogram of phrase indices for all 223 neurons from 6 birds. **e)**

188 Undirected song from a different male showing periods of cage noise or hopping behavior (yellow) and feeding behavior (green).  
189 Blue boxes indicate the male calling. Red dashed lines indicate onsets and offsets of song bouts.

190

191

## 192 **Peri-Song and Pan-Song Neurons**

193 A substantial fraction of all imaged neurons (41/223 neurons) were active exclusively before or after singing (**Figure**  
194 **2d**, neurons with a phrase index of -1). These peri-song neurons exhibited sparse heterogeneous activity before song  
195 phrases and were occasionally active in the silent intervals between song motifs (**Figure 3a-c, and EDFig. 10**). Both  
196 the number of active peri-song neurons and the density of calcium events increased 1-3 s prior to song onset, with  
197 the event rate peaking 1.5 s prior to singing (**Figure 3b-c, i**) and then declining sharply in the last second before song  
198 onset (**Figure 3i**). Most of the neurons we imaged, pan-song neurons (143/223 neurons), exhibited sparse,  
199 heterogeneous activity before and/or after song and exhibited time-locked sequences during singing (**Figure 3d-f**).  
200 Pan-song neurons exhibited substantial increases in their activity in the last ~2 s prior to song onset. Their activity  
201 continued to increase as the activity of peri-song neurons began to ramp-off prior to song onset (**Figure 3g,i, and**  
202 **EDFig. 11**). Differences in pre-song activity profiles between peri-song and pan-song neurons (Kolmogorov-Smirnov,  
203 K-S test,  $k = 0.26$ ,  $p = 0.056$ ) may support temporally coordinated network transitions as birds prepare to sing,  
204 suggesting that neural sequences for song could emerge as part of changing network dynamics in HVC.

205

206 During production of song motifs, pan-song neurons exhibited sequential bursts of activity that roughly coded for all  
207 moments in the bird's song, similar to sequencing previously described in song neurons. We found that pan-song and  
208 song neurons had a similar probability of being active with each motif (song neurons probability of at least one  
209 calcium event per motif  $P(\text{motif}) = 0.72 \pm 0.32$ , pan-song neurons  $P(\text{motif}) = 0.66 \pm 0.29$ , K-S test,  $p = 0.11$ ; **EDFig. 12**);  
210 however, we also noted that the probability of being active was lower than in electrophysiological recordings<sup>1,28</sup>. This  
211 likely reflects limitations in event detection using single-photon calcium imaging. To better understand this, we  
212 calculated signal to noise ratios (SNRs, signal defined as peak fluorescence of calcium events during song) between  
213 pan-song neurons and song neurons during singing (SNR song neurons =  $913.8 \pm 405.4$  (7 neurons), pan-song neurons  
214 =  $638.3 \pm 248.2$  SEM,  $n=36$  neurons). We found no difference in SNR between these neurons (two-sample t test,  $p =$   
215  $0.6$ ; SNR calculated from 156 calcium events (28 from song neurons and 128 from pan-song neurons), suggesting that  
216 although we are underestimating activity during singing, these limitations are unlikely to obscure differences  
217 between pan-song and song neurons.

218

219 In addition to preceding song onset, neurons also marked the end of song phrases. Within 5 seconds after song  
220 offset, peri-song neurons exhibited a sharp increase in activity followed by a gradual ramp-off (**Figure 3a-c, h, j, and**  
221 **EDFig. 11**) whereas pan-song neurons only exhibited a ramp-off (**Figure 3d-f, h, j**). Although the distribution of post-  
222 song activity differed between peri-song and pan-song neurons (K-S test,  $k = 0.2692$ ,  $p = 0.0373$ ), both populations



223 returned to baseline activity over similar timescales. The function of post-song activity is unclear but may provide a  
 224 circuit mechanism for birds to rapidly re-engage in song performances given appropriate social feedback or context.  
 225 Courtship singing is tightly coupled to social interaction with female birds and it is common for male birds to string  
 226 two or more song phrases together during courtship song<sup>42</sup> (see **EDFig. 1 & 6**). Post-song activity could also reflect  
 227 moments when birds are unable to continue singing due to hyperventilation induced by the rapid respiratory  
 228 patterns associated with song<sup>43</sup>. To explore this idea, we examined whether the duration of song phrases was  
 229 correlated with the number of active neurons in the post-song period, but found no correlation ( $r^2 = 0.03$ ). Although  
 230 the function of post-song activity is unclear, our results indicate that pre-song activity forecasts impending song and  
 231 suggest a previously unappreciated role for the HVC<sub>RA</sub> network in planning or preparing to sing.  
 232

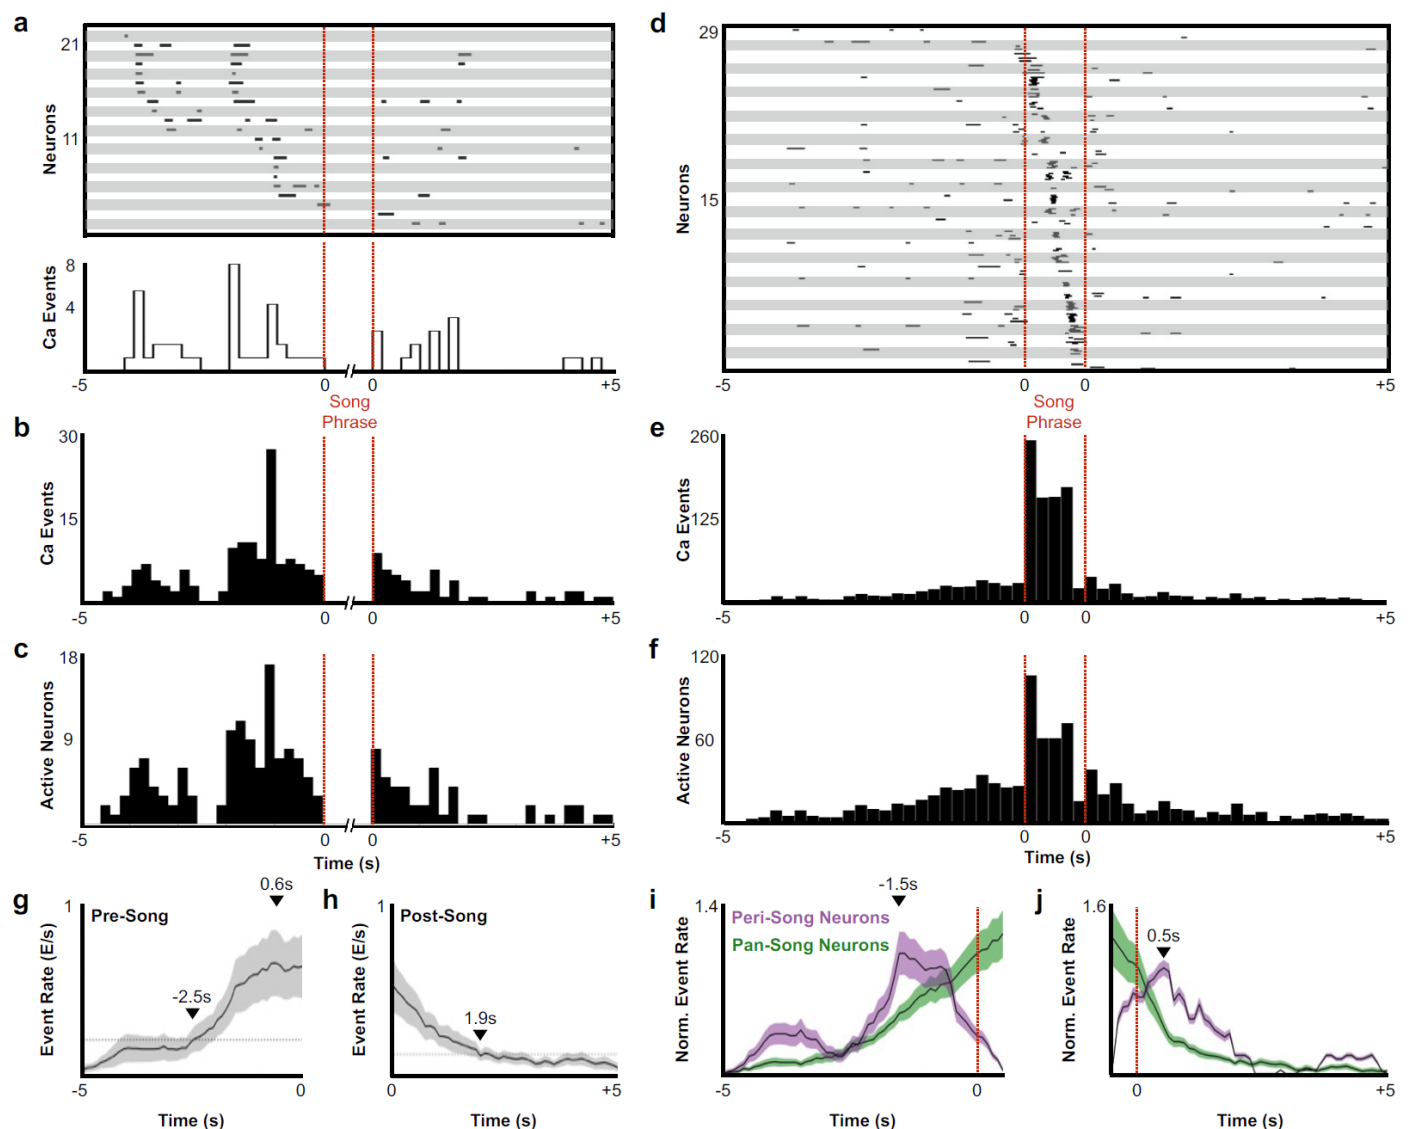

233

234 **Figure 3. Description of peri-song and pan-song neuron activity.** a) 21 peri-song neurons from one bird singing 3 bouts  
 235 containing 6 motifs (1st bout: 3 motifs; 2nd bout: 2 motifs; 3rd bout: 1 motif, the dashed red lines indicate the onset and offset  
 236 of the three bouts). Each row shows song-aligned calcium events (CEs N=54 CE; average rise time =  $0.18 \pm 0.09$  s SD). The  
 237 shaded horizontal bars separate different neurons. One CE is seen to overlap with the beginning of the song phrase. The onset

238 time for this event is 170 ms before song, but the rise time is slow and extends to 100 ms after song onset. Below the CE raster  
239 plot is a peri-event histogram with the event rate in 200 ms bins shown for the trial above. **b)** Song-aligned CEs in peri-song  
240 neurons 5 s before and after phrase onset (41 neurons, 190 CEs). The activity rate peaks ~1.2 s before phrase onset. **c)** The  
241 number of active peri-song neurons in 200 ms bins before and after phrase onset (41 neurons, 169 CEs). **d)** Song-aligned activity  
242 of pan-song neurons (same trial as shown in panel **a**, N=29 neurons, 253 CEs). **e)** Peri-event histogram of pan-song neurons (143  
243 neurons, 1,333 CEs). **f)** The number of active pan-song neurons in 200 ms bins (143 neurons, 853 CEs). **g)** Pre-phrase event rate  
244 for all pan-song neurons. The event rate was calculated by counting event onsets in 100 ms bins and then smoothed with a 1  
245 second moving window. 28 trials are shown from 5 birds, the black line indicates the average event rate. The black triangles mark  
246 the peak event rate occurring 0.6 s before song onset and 2.5 s when the event rate reaches 3 SD above the baseline event rate,  
247 respectively. Baseline event rate was determined by measuring the average event rate from -5 to -4 seconds before song onset.  
248 Shaded region indicates standard deviation. **h)** Post-phrase event rate for all neurons. 27 trials are shown from 5 birds. The black  
249 triangles mark when the event rate reaches 3 SD above the baseline event rate. Baseline event rate was determined by  
250 measuring the average event rate during -5 to -4 seconds before song onset. **i)** Pre-phrase event rate for peri-song and pan-song  
251 neurons calculated as calcium events in moving 1 s windows. The black line indicates average event rate. The black triangle  
252 indicates peak event rate occurring 1.5 s before phrase onset. **j)** Same as **i**, but post-phrase event rates for peri-song and pan-  
253 song neurons. The black triangle indicates peak event rate occurring 0.5 s after phrase offset.  
254

255

### 256 **Common Preparatory Activity in Premotor Circuits Across Multiple Species**

257 To examine whether preparatory activity is a common circuit mechanism for the production of birdsong, we  
258 recorded HVC and RA neural activity in another songbird species, Bengalese finches (*Lonchura striata domestica*).  
259 Motor planning and preparation facilitate the accurate execution of fast and precise movements, which are common  
260 to the songs of zebra finches and Bengalese finches, however, syllable sequences in Bengalese finches are less  
261 stereotyped than those in zebra finches<sup>44</sup>. Using multi-channel neural recordings in HVC, we identified robust  
262 preparatory activity several hundreds of milliseconds prior to song onset (**Figure 4a-g**). The pre-song and song-  
263 related multiunit spike rates were significantly above baseline (Wilcoxon signed-rank test after Bonferroni correction,  
264  $n = 29$  MU sites. pre-song:  $z = 4.62$ ,  $p = 0.030$ ; song:  $z = 4.70$ ,  $p < 0.001$ ), whereas the post-song spike rates was not ( $z$   
265  $= 2.17$ ,  $p = 0.089$ ). Pre-song activity increased above baseline  $-1.47 \pm 1.05$  s prior to song onset, a timescale that  
266 closely matched the timing of peak calcium-event rates in peri-song neurons in zebra finches. The offset timing of  
267 post-song activity was  $0.42 \pm 0.23$  s. This indicates that preparatory activity in HVC is a common network motif  
268 important for song generation and the onset of precise neural sequences.  
269

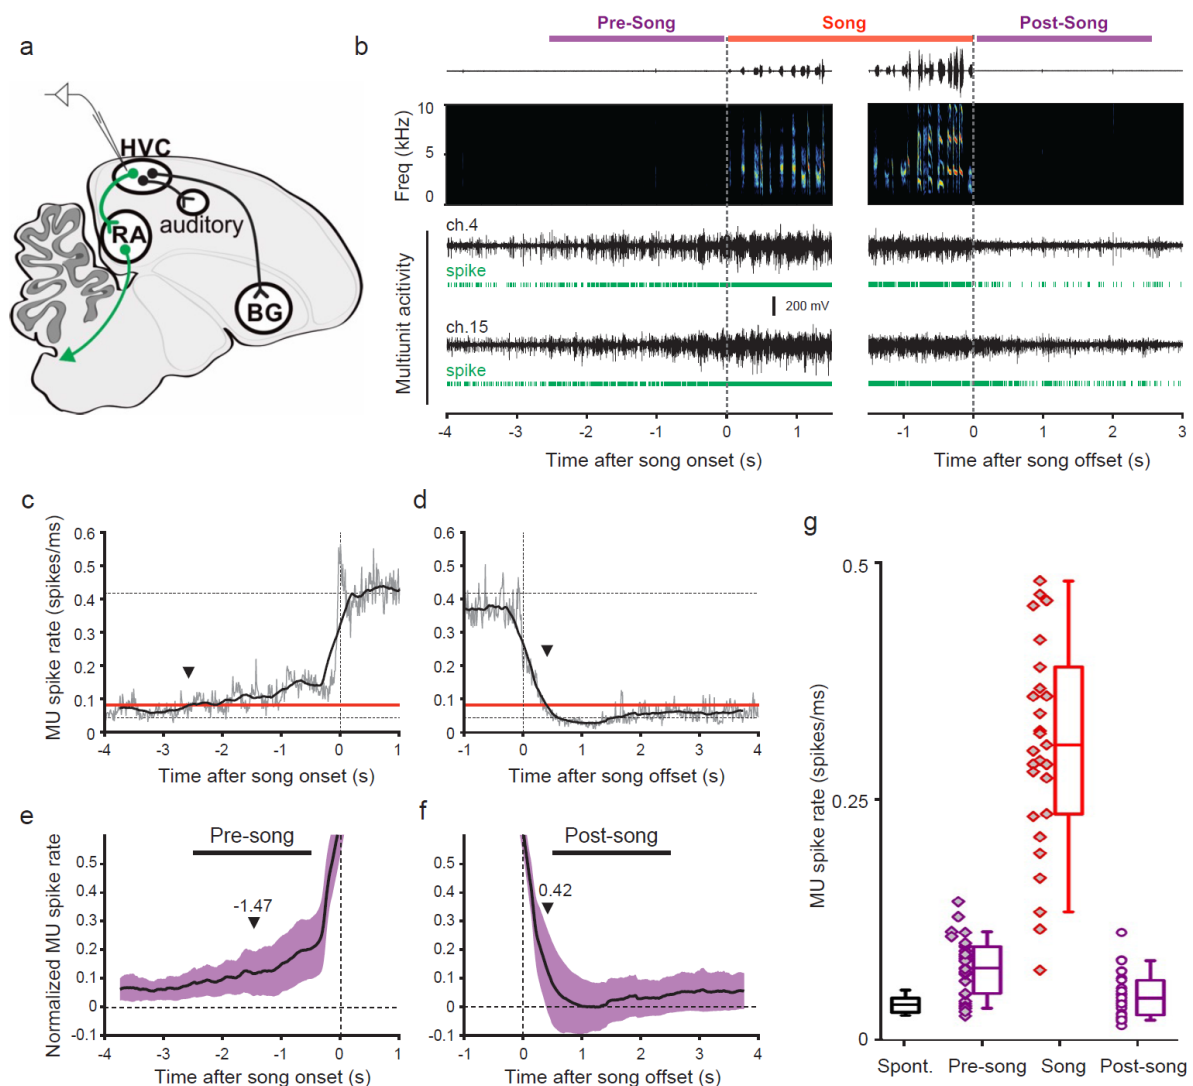

270

271

272

273

274

275

276

277

278

279

280

281

282

283

284

285

286

287

288

289

**Figure 4. Pre-song and post-song firing in HVC of Bengalese finches.** **a)** Schematic of recording site. **b)** An example of song initiation and termination (dashed lines indicate phrase onset and offset, pre and post-song period marked in purple and song marked in red) and simultaneously recorded HVC multiunit activity on two electrodes (channels #4 and #15, bird p15o56). Green raster plots represent detected spikes on the two electrodes. **c,d)** Phrase onset (c) and offset (d) related average multiunit activity obtained from an example electrode channel (vertical dashed lines indicate phrase onset and offset, respectively). The spike rate was averaged across multiple song onsets or offsets and was first calculated in 10 ms bins (gray thin line) and then smoothed with a 500 ms window (bold line). Upper and lower horizontal dotted lines show mean spike rates during singing and baseline, respectively. Arrowheads indicate onset (c) and offset (d) timings of spike rate, as assessed by crossing of a pre-defined threshold (red line). **e,f)** Normalized multiunit activity related to phrase onset (e) and offset (f). Before averaging, the spike rate trace of each electrode channel was normalized such that 0 corresponds to the mean rate during baseline and 1.0 to the mean rate during singing (see Method). The bold line shows an average across all electrodes and birds ( $n = 29$  channels). Purple area indicates  $\pm$  one SD. Arrowheads show mean onset (e) and offset (f) timing of pre-song and post-song activity, respectively. **g)** Mean multiunit spike rates during spontaneous (black), pre-song (purple with diamonds), song (red), and post-song (purple with circles) periods. Pre-song and post-song periods are indicated by the horizontal bars in panels e and f. Box plots show the median, 25<sup>th</sup> and 75<sup>th</sup> percentiles with whiskers showing  $\pm 1.5$  IQR.

HVC contains multiple cell types, including interneurons and at least three different classes of projection neurons<sup>45,46</sup>. Multichannel recordings in HVC provide an important read-out of the network activity prior to song onset but alone are insufficient to assess whether this preparatory activity influences descending cortical pathways involved in song

290 motor control. Therefore, we recorded single unit electrophysiological activity from the downstream targets of HVC<sub>RA</sub>  
 291 neurons within the cortical premotor nucleus RA. Projection neurons in RA are tonically active at baseline (**Figure 5a**,  
 292 “Spontaneous”) and exhibit precise bursts of activity during singing (**Figure 5a**, “Song”), a transition well captured by  
 293 changes in the coefficient of variation of the inter-spike intervals ( $CV_{ISI}$ , **Figure 5c**). We measured changes in RA  
 294 neuron activity in the period just prior to song initiation and just after the conclusion of each song bout (between 0.5  
 295 and 2.5 s before/after the first/last song syllable). As expected, we did not find substantial differences in spike rates  
 296 between non-singing and singing states (not shown) but found that the  $CV_{ISI}$  for RA neurons changed significantly  
 297 during song, reaching higher values during pre-song, song, and post-song epochs as compared to spontaneous  
 298 activity (**Figure 5d**,  $p < 0.005$ , two-sided K-S tests). This suggests that HVC<sub>RA</sub> sequences associated with preparation to  
 299 sing propagate to downstream premotor circuits prior to song onset and that HVC continues to influence descending  
 300 motor pathways following song cessation.  
 301

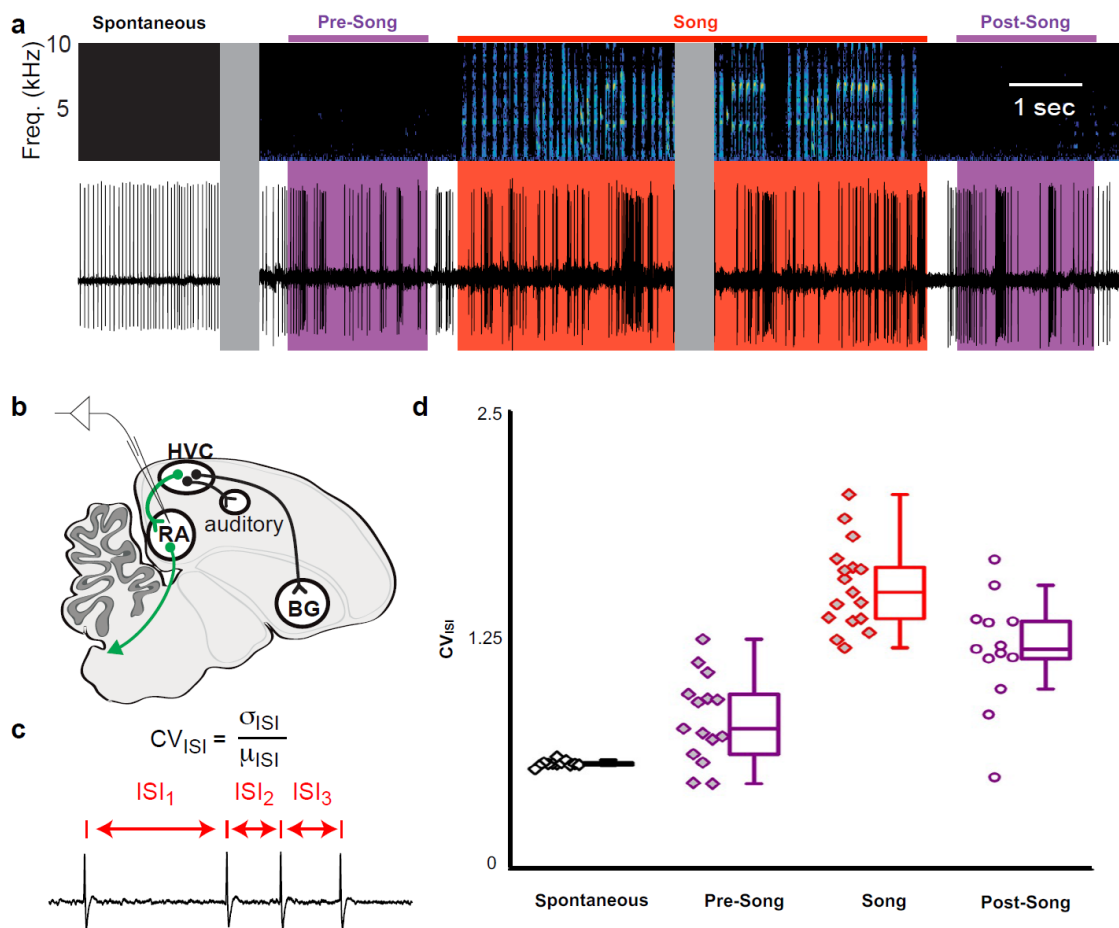

302  
 303 **Figure 5. a**) Example extracellular recording from a single RA neuron. Colored areas highlight four epochs (spontaneous, pre-song  
 304 (purple), song (red), and post-song (purple)) relative to the beginning and ending of a song phrase (see main text). Grey areas  
 305 indicate discontinuities in time (pauses between “spontaneous” epoch and song initiation and within the middle portion of the  
 306 song bout). **b**) Schematic of recording site. **c**) We quantified inter-spike-intervals (ISIs) and computed the coefficient of variation  
 307 (CV) in each epoch. **d**) We found significantly higher ISI variability in the pre-song epoch (purple with diamonds) compared to  
 308 spontaneous ( $p < 0.005$ , two-sided K-S test). Box plots show the median, 25<sup>th</sup> and 75<sup>th</sup> percentiles with whiskers showing  $\pm 1.5$   
 309 IQR.

310

### 311 **Peripheral Preparation to Sing**

312 Pre-song activity could reflect motor planning (changes in network activity independent of changes in the motor  
313 periphery) and/or motor preparation that functions to coordinate changes in the motor periphery as birds prepare to  
314 sing. Song is a respiratory behavior that is primarily produced during expiration and silent intervals in the song  
315 correspond to mini-breaths, which are rapid, deep inspirations<sup>31,47</sup>. How birds plan to sing or prepare the respiratory  
316 system to sing is poorly understood, but there is evidence that prior to song onset, oxygen consumption decreases  
317 and respiratory rate increases<sup>43</sup>. To explore the time course of changes in respiratory patterns in more detail, we  
318 used air sac pressure recordings in singing zebra finches (**Figure 6a-c**). During singing, birds significantly accelerated  
319 the respiratory rhythm and marginally shifted towards longer periods of expiration during each cycle (**Figure 6b**,  
320 respiratory duration pre-song =  $0.38 \pm 0.04$  s (SD), song =  $0.18 \pm 0.03$  s, post-song =  $0.39 \pm 0.06$  s:  $F(2,10) = 46.63$ ,  $p <$   
321  $0.001$ ; duty cycle (% of time in expiration) pre-song =  $58\% \pm 3$  (SEM), song =  $57\% \pm 2.5$ , post-song =  $61\% \pm 2.4$ :  $F(2,10) =$   
322  $3.56$ ,  $p = 0.07$ ). We found that significant changes in respiration also preceded song onset. Respiratory cycle duration  
323 significantly accelerated in the last second prior to song onset with relative decreases of expiratory phases  
324 (respiratory duration:  $F(3,15) = 7.67$ ,  $p = 0.02$ , duty cycle:  $F(3,15) = 4.077$ ,  $p = 0.07$ ; **Figure 6d**). Following song  
325 termination, birds immediately returned to longer respiratory cycles but during the first second post-song, they spent  
326 more time exhaling compared to inhaling, a behavior likely involved in helping to recover from singing-related  
327 hyperventilation (respiratory duration:  $F(2,10) = 0.509$ ,  $p < \text{n.s.}$ , duty cycle:  $F(2,10) = 6.553$ ,  $p < 0.01$ ; **Figure 6e**). These  
328 changes in respiration during the last second before and first second following song support the idea that  $HVC_{RA}$   
329 neurons provide descending motor commands that coordinate transitions between non-vocal and vocal states by  
330 coordinating respiratory patterns. The lack of changes at earlier time-points prior to singing also indicate that pre-  
331 song activity 1-3 s prior to song onset may reflect motor planning or the decision to sing, rather than respiratory  
332 preparation. Together these, findings support the idea that  $HVC_{RA}$  neurons could function in aspects of motor  
333 planning as well as preparation.

334

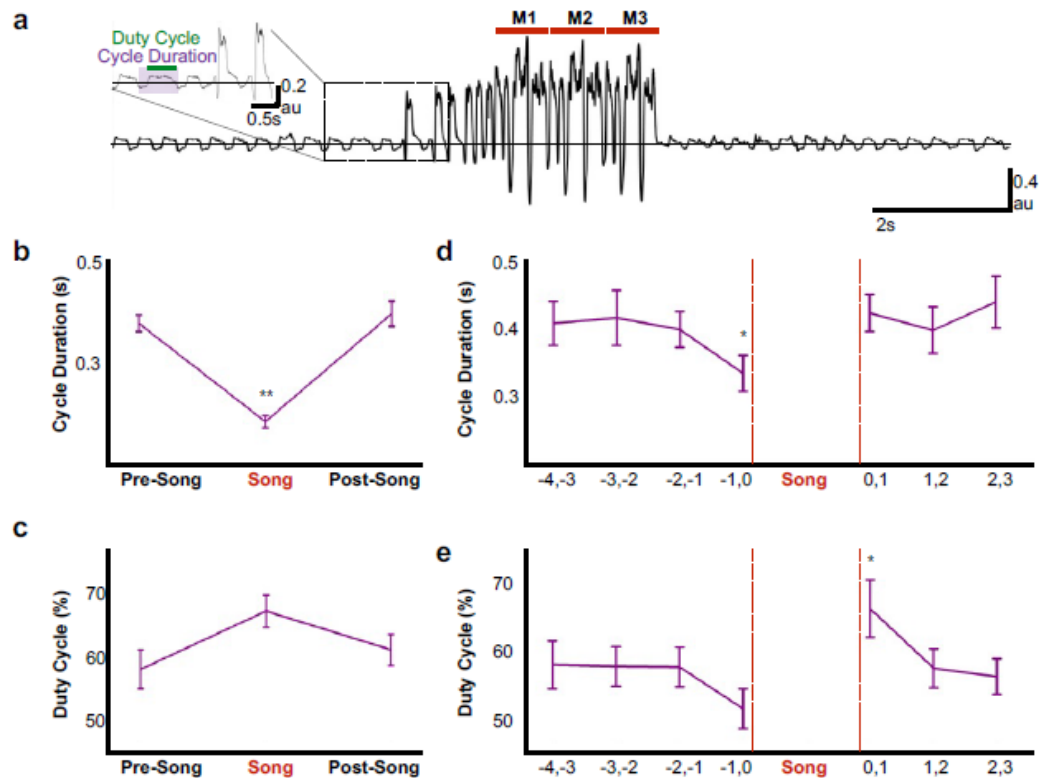

335

336

337

338

339

340

341

342

343

## 344 DISCUSSION

345

346

347

348

349

350

351

352

353

354

355

356

357

**Figure 6. Air sac pressure recording in zebra finches.** **a**) Waveform of pressure changes during non-singing and singing periods. Waveforms above the horizontal line (suprambient pressurization) indicate expiration and below the line (subatmospheric pressurization) indicate inhalation. Inset illustrates measurements for respiratory cycle duration and duty cycle (% time in expiration). **b**) Respiratory cycle duration and **c**) duty cycle of expiratory phase before (Pre), during (Song), and after (Post) song production (N = 6 birds). **d**) Plots of average respiratory cycle durations and **e**) duty cycles during pre-song and post song periods (N = 6 birds). Longer duty cycles correspond to increased periods of expiration.

Previous studies suggested that the  $HVC_{RA}$  network functions exclusively as a time-keeper, encoding motif-level temporal representations of song via propagation of precisely timed neural sequences<sup>1,4,6,28,34,35</sup>. Central to this view is that the network is active only during singing and hence behaves in only two modes, inactive or propagating neural sequences. Our principal result is that neural sequences emerge as part of orchestrated activity across the network of  $HVC_{RA}$  neurons and that this activity is correlated with motor preparation prior to song initiation. Peri-song and pan-song neurons forecast the start of singing. Peri-song neurons are inactive during song, whereas pan-song neurons become heterogeneously active prior to time-locked sequential activity during song performances (**Figures 2 & 3**). Preparatory activity in  $HVC_{RA}$  neurons precedes the pre-bout activity observed in other classes of HVC neurons in zebra finches and Bengalese finches (**Figure 4**), suggesting that  $HVC_{RA}$  neurons may seed network wide changes in activity<sup>39-41</sup>. The rigid stereotypy of singing behavior enables comparisons from different levels of the nervous system and periphery. We find that preparatory activity in  $HVC_{RA}$  neurons drives descending motor commands via RA and motor movements that set the stage for producing song (**Figures 5 & 6**). Because song is a self-initiated, volitional behavior, our findings further indicate that the  $HVC_{RA}$  network either functions as a sensitive read-out of the decision



358 to sing or as an integral factor in the decision itself. Finally, previous studies have shown that about half of HVC<sub>RA</sub>  
359 neurons are inactive during song<sup>1,27-29</sup>. We find that approximately half of this network is active at peri-song intervals  
360 and propose that one function of HVC<sub>RA</sub> neurons is to plan and prepare for song performance.

361

362 Together, these findings support a simple model for song and neural sequence initiation. Preparatory activity in  
363 populations of HVC<sub>RA</sub> neurons drives descending motor commands via RA and its connections to the ventral  
364 respiratory group and syringeal motoneurons in the medulla<sup>48-53</sup>. Given the sparsity of HVC<sub>RA</sub> neuron activity and the  
365 convergence of HVC<sub>RA</sub> input to RA, it is likely that only population activity, like that described here, is sufficient to  
366 drive bursting in RA. These motor signals increase respiratory rate, bringing it closer to the high rate needed to  
367 coordinate production of song syllables. Because the initiation of singing requires precise coordination between  
368 respiratory state and descending motor commands, we hypothesize that recurrent projections from the brainstem  
369 update activity in HVC and trigger the initiation of neural sequences once the periphery is readied for the first  
370 respiratory cycle for song<sup>29,54,55</sup>. Circuitry related to recurrent projections into HVC increase the HVC<sub>RA</sub> activity  
371 hundreds of milliseconds prior to song onset<sup>56-58</sup> and thus may also mediate shifts in activity between peri-song and  
372 pan-song neurons.

373

374 Absent from this model is how activity in peri-song and pan-song neurons is first initiated seconds before song onset.  
375 HVC receives input from cholinergic neurons in the basal forebrain<sup>59-61</sup>, noradrenergic neurons in the locus  
376 coeruleus<sup>62</sup>, and dopaminergic neurons in the midbrain<sup>63</sup>, any or all of which could play potent roles in shifting the  
377 excitability of subsets of HVC<sub>RA</sub> involved in song preparation and initiation. Also absent are specific predictions about  
378 the role of peri-song neurons and pan-song neurons in motor-planning. It is not yet known whether preparatory  
379 activity in HVC is necessary for song initiation or production. These experiments will require novel closed-loop  
380 manipulations to exclusively disrupt peri-song or pan-song neuron activity independent of any activity involved in  
381 neural sequences. If possible, such experiments will undoubtedly lend insights into whether HVC is involved in  
382 aspects of motor-planning independent of motor-preparation.

383

384 Sequential activation of neurons is thought to provide computational advantages for encoding temporal information  
385 associated with episodic memories or behavioral sequences. Neural sequences in HVC provide one of the cleanest  
386 examples for linking brain activity with a naturally learned and volitionally produced skilled motor behavior. Our  
387 study provides a glimpse of how these sequences emerge through temporally coordinated transitions within a  
388 potentially hierarchically organized network and suggests a general framework for initiating the production of skilled  
389 motor behaviors.

390 **Acknowledgments:** The authors thank Joseph Takahashi for generous use of a miniscope for calcium imaging  
391 experiments, J Holdway, M Ikeda, D Merullo, B Pfeiffer, A Wood, and L Xiao for comments on the manuscript and  
392 discussions, the Genie Project at Janelia for development of calcium indicators, T Komiyama and A Peters for analysis  
393 codes, J Holdway and A Guerrero for laboratory support and animal husbandry, and J Dukes for assistance with data  
394 analysis. This research was supported by grants from the US National Institutes of Health R01NS108424 and  
395 R01DC014364 to TFR, R01NS108424 to TFR, RHRH and BGC, and R01NS084844 and R01NS099375 to SJS, the National  
396 Science Foundation IOS-1457206 to TFR, and the Swiss National Science Foundation 31003A\_127024 and  
397 31003A\_156976 or RHRH.

398  
399 **Author contributions:** V.K.D. and T.F.R. initiated this study. V.K.D. collected and analyzed calcium imaging data.  
400 B.G.C. collected and analyzed respiratory data. R.O.T., S.K. and R.H.R.H. collected and analyzed the chronic recording  
401 data from HVC. S.J.S. collected and analyzed the chronic recording data from RA. V.K.D. and T.F.R. wrote the paper  
402 with input from all authors.

403  
404 **Author Information:** The authors declare no competing financial interests. Correspondence and requests for  
405 materials should be addressed to T.F.R. (todd.roberts@utsouthwestern.edu)  
406

407

408

## 408 **Methods**

409

### 409 **Animals**

410 Experiments described in this study were conducted using adult male zebra finches and Bengalese finches (>90 days  
411 post hatch). During experiments, birds were housed individually in sound-attenuating chambers on a 12/12 h  
412 day/night schedule and were given ad libitum access to food and water. All procedures were performed in  
413 accordance with established protocols approved by Animal Care and Use Committee's at UT Southwestern Medical  
414 Centers, Texas Christian University, Emory University, and the Korea Brain Research Institute.

415

### 416 **Viral Vectors**

417 The following adeno-associated viral vectors were used in these experiments:  
418 AAV2/9.CAG.Flex.GCaMP6s.WPRE.SV40 (University of Pennsylvania) and AAV2/9.CMV.Cre.WPRE.SV40 (University of  
419 Pennsylvania). All viral vectors were aliquoted and stored at -80°C until use.

420

### 421 **Imaging**

422 Two-photon microscopy was conducted with a commercial microscope (Ultima IV, Bruker) running Prairie View  
423 software using a 20x (1.0 NA) objective (Zeiss) with excitation at 920 nm (Ti-Sa laser, Newport). Imaging was  
424 conducted in lightly anesthetized animals that were head-fixed using a custom-built apparatus. Single-photon images  
425 of HVC were acquired through the cranial window using a sCMOS camera (QImaging, optiMOS). These images were  
426 used to guide placement of the baseplate for miniaturized single-photon microscope.

427

### 428 **Stereotaxic Surgery, Cranial Windowing, and Baseplate Implantation**

429 All surgical procedures were performed under aseptic conditions. Birds were anesthetized using isoflurane inhalation  
430 (~1.5-2%) and placed in a stereotaxic apparatus. Viral injections were performed using previously described  
431 procedures (Roberts et al., 2012, 2017) at the following approximate stereotaxic coordinates relative to interaural  
432 zero and the brain surface (rostral, lateral, depth, in mm): HVC (0, 2.4, 0.1-0.6); and RA (-1.0, 2.4, 1.7-2.4). The  
433 centers of HVC and RA were identified with electrophysiology. For calcium imaging experiments, 1.0 – 1.5  $\mu$ L of Cre-  
434 dependent GCaMP6s was injected at 3 different sites into HVC and 350 nL of Cre was injected into RA. Viruses were  
435 allowed to express for a minimum of 6 weeks before a cranial window over HVC was made. Briefly, a unilateral  
436 square craniotomy (~3.5 x 3.5 mm) was created over HVC and the dura was removed. A glass coverslip was cut to  
437 match the dimensions of the craniotomy and held in place with a stereotaxic arm as Kwik Sil was applied to the edges  
438 of the cranial window. Dental acrylic was applied over the Kwik Sil and allowed to slightly overlap with the glass  
439 coverslip to ensure the window would not move and would apply the appropriate amount of pressure to the brain.  
440 An aluminum head post was affixed to the front of the bird's head to enable head-fixed imaging under the 2-photon  
441 microscope and to enable head-fixation for baseplate implantation. Following verification of labeling, identification of  
442 HVC boundaries, and high-resolution images of neurons under the 2-photon microscope, the bird was lightly  
443 anesthetized with isoflurane and the miniaturized fluorescent microscope (Inscopix) was placed over the cranial  
444 window. The field of view that matched the 2-photon images was identified and the focal plane that enabled the  
445 largest number of neurons to be in focus was selected. Dental acrylic was used to fix the baseplate in the desired  
446 position and any exposed skull was covered with dental acrylic. Once the dental acrylic dried, the microscope was  
447 removed from the baseplate and the bird was allowed to recover overnight. About 30 minutes before the birds'  
448 subjective daytime, the microscope was attached to the counterbalance (Instech) with enough cable to allow the bird  
449 to move freely throughout the cage. The microscope was then secured to the baseplate with a setscrew. The bird  
450 was allowed to wake up and accommodate to the weight of the microscope over the next 2-3 days.

#### 451 452 **GCaMP6s Imaging Using a Miniaturized Fluorescent Microscope**

453 The miniaturized fluorescent microscope (Inscopix) was not removed following successful baseplate implantation and  
454 remained attached to the birds' head until either the cranial window closed or 7-10 days had passed. The  
455 counterbalance was adjusted based on the observed behavior of the bird and its ability to move freely. The female  
456 was not housed in the cage with the male bird, but instead was introduced to the males during a minimum of 3  
457 morning and afternoon sessions to evoke directed song. Video recording was first started followed by 5 to 10  
458 seconds of spontaneous recording with the miniaturized fluorescent microscope. The female bird was placed in the  
459 cage as quickly and as with little disruption as possible for each session. If the male bird did not sing within a minute  
460 of the females' presence, the session was stopped, and the female was removed. All trials were recorded on video,  
461 and audio was recorded using Sound Analysis Pro (SAP) software and the HD video camera microphone. Calcium  
462 imaging was performed at 30 frames per second (fps), at 1080x1920 resolution, Gain was set to 4, and Power was set

463 to 90% for all birds, behavioral videos were collected at 24 fps. Calcium imaging data and behavioral data was  
464 synchronized using start of calcium imaging on a frame by frame basis.

465

#### 466 **Defining Song and Peri-Song Behavior**

467 We defined singing as the time from the first introductory note to the end of the last syllable of the birds' bout. The  
468 time (inter-bout interval) between multiple renditions of song motifs determined whether subsequent singing was  
469 included as another bout in the phrase or the start of another phrase. Silent gaps greater than 1 second but less than  
470 2 seconds between the offset of the last syllable and the start of the next syllable in a motif were treated as inter-  
471 bout intervals and calcium events occurring during this time were excluded from song-activity analysis. Inter-bout  
472 intervals less than 2 seconds were included in the same phrase. Inter-bout intervals greater than 2 seconds served as  
473 the cutoff between two separate phrases. Calcium events occurring during inter-phrase intervals (time between end  
474 of previous song syllable and start of next song syllable, must be greater than 2 seconds) were correlated with the  
475 closest phrase onset or offset.

476

#### 477 **Calcium image processing and analysis**

478 Calcium images were collected using the miniaturized fluorescent microscope developed by Inscopix<sup>32</sup>. First, the FOV  
479 was spatially cropped to exclude pixels that did not include neurons or observable changes in fluorescence. Next, the  
480 preprocessing utility within the Mosaic data analysis software was used to spatially bin the images by a factor of 2 to  
481 reduce demands on computer memory and enable faster data processing. The TurboReg implementation within  
482 Mosaic was used to perform motion correction. A reference image was created using a maximum intensity projection  
483 of the dataset and the images were aligned in the x and y dimension to the reference image. Imaging datasets with  
484 translational motion greater than 20 pixels in either the x or y dimensions were excluded from further data analysis.  
485 Post-registration black borders were spatially cropped out. The resulting spatially-cropped, preprocessed, and motion  
486 corrected calcium imaging datasets were exported for further analysis in custom Matlab scripts.

487

488 We performed ROI-based analysis on the motion-corrected calcium imaging datasets using previously described  
489 methods<sup>3</sup>. ROIs were manually drawn around identifiable soma and a secondary ROI that extended 6 pixels around  
490 the boundaries of the neuronal ROI was used to estimate background fluorescence (i.e. neuropil or other neurons).  
491 The pixel values were averaged within the neuronal and background ROIs, and background fluorescence signal was  
492 subtracted from neuronal signal. An iterative procedure using custom Matlab scripts were used to estimate baseline  
493 fluorescence, noise, and active portions of the traces<sup>3</sup>. A subset of calcium images were re-analyzed using previously  
494 described constrained non-negative matrix factorization (CNMF) methods, but calcium fluorescence traces were  
495 identical to the traces pulled out by the ROI-based analysis<sup>64</sup>. Calcium traces generated by ROI-based analysis were  
496 further deconvolved to produce inferred calcium traces using the pool adjacent violators algorithm (PAVA)<sup>65</sup>. The

497 deconvolved calcium traces were normalized to values between 1 and 0 to enable visualization of activity across  
498 different neurons during the same trial. Calcium transients that were 3 SD. above baseline activity were recorded as  
499 events. The corresponding onset times and the rise times to peak fluorescence of individual calcium transients were  
500 correlated with synchronized behavior.

501

502 All calcium events were first categorized as falling into peri-song or song behavioral epochs. Peri-song was limited to  
503 the 5 second period before song onset (including introductory notes) and the 5 second period after offset of the last  
504 syllable. These event counts were used to assign a Phrase index to all imaged neurons. Neurons that had fewer than  
505 2 calcium events recorded over a day of singing were excluded from further analysis because sparsity of calcium  
506 events could spuriously identify neurons as peri-song or song exclusive. We combined the number of calcium events  
507 from neurons imaged across multiple trials during the same day. Neurons imaged across multiple days were treated  
508 as unique neurons. The phrase index was calculated as a ratio of the total number of song events imaged from a  
509 neuron during a day subtracted by the number of peri-song events to the total number of calcium events. This  
510 bounded the phrase index to values of -1 (peri-song exclusive) and +1 (Song exclusive). We used the phrase index to  
511 examine the timing properties of neurons active only during peri-song, song, or both behavioral epochs.

512

513 To examine the distribution of calcium events, we generated histograms with bin sizes of 200 ms. Calcium event  
514 onset times were shifted to negative values if they occurred prior to song onset. Calcium events occurring after song  
515 offset were shifted by 1 second to allow visualization of a 1 second song phrase window. The number of active  
516 neurons was calculated in 200ms bins, if a neuron had more than 1 calcium event within a 200 ms window it was  
517 considered active only once. Event rates were calculated as a moving average of the number of events organized in  
518 100ms windows before and after song onset. Rates were calculated by phrase using a 1 second moving average  
519 window, this window reaches a minimum of 500 ms at boundaries (-5, +5 seconds, and at song onset and offset). The  
520 average event rate and standard deviation was calculated from all pre and post phrase event rates from all birds.

521

### 522 **Fluorescence Analysis Across Intervals**

523 Average fluorescent changes were measured for each neuron across baseline, pre-song, post-song, and song  
524 behavioral periods. Baseline was defined as a behaviorally quiet period covering 5s of fluorescent activity that was  
525  $\geq 10$  s removed from periods of singing or calling. Pre-song was 5s before phrase onset and post-song was 5s after  
526 phrase offset. The background subtracted fluorescent traces were used to measure average fluorescence across the  
527 above intervals for all phrases and all birds. Averaged fluorescent values were then normalized to the average  
528 fluorescence measured during song.

529

### 530 **Comparison of SNR and Calcium Event Peak Magnitudes**

531 We measured the SNR of events occurring during song for a subset of pan-song and song neurons. The SNR was  
532 calculated as a ratio of peak fluorescence for each song event per neuron to the average fluorescence from baseline  
533 period within the trial (as above, 5s of fluorescent activity that was  $\geq 10$ s removed from periods of singing or calling).  
534 We determined the average SNR for each neuron and examined differences between pan-song and song neurons.

535

536 Peak magnitudes during peri-song and song periods of pan-song neurons were measured using normalized  
537 deconvolved fluorescent traces. The peak values for each pan-song neuron (with phrase indices between -0.18 to  
538 +0.18) during peri-song and song periods were used to evaluate potential differences between calcium events  
539 occurring outside of song versus during song.

540

#### 541 **Neural Recordings**

542 Multiunit recordings of HVC neurons were collected from three adult (>90 days old) male Bengalese finches. All  
543 procedures were approved by the Korea Brain Research Institute. An array of 16 tungsten microwires (175  $\mu$ m  
544 spacing, OMN1005-16, Tucker Davis Technologies) was implanted into left HVC. The location of HVC was identified by  
545 searching for spontaneous spike bursts and for antidromic response to stimulation in RA. The extracellular voltage  
546 traces of all channels from birds singing alone (without presentation of female) were amplified and recorded with an  
547 interface board (RHD2132, Intan Technologies) at a sampling rate of 25kHz. The interface board was tethered to a  
548 passive commutator (Dragonfly Inc.) via a custom-made light-weight cable. In total we obtained HVC recordings from  
549 35 electrode channels in three birds (15, 7, and 8 channels, respectively), all of which showed spontaneous bursts  
550 typical of HVC neurons. The impedance of successful electrodes was around 100-300 k $\Omega$ .

551

552 Recorded signals were bandpass filtered (0.3-5kHz) and negative signal peaks exceeding 4 SD of spontaneous activity  
553 (no-song period separated more than 10 seconds from nearest song bouts) were interpreted as multi-unit spikes. In  
554 total 38, 62, and 212 song onsets, and 42, 23, and 280 offsets were identified in these birds, respectively. We  
555 produced firing rate-traces from each electrode channel with 10ms resolution and averaged them across song  
556 renditions. After smoothing by moving average with 500ms window, the averaged firing rates were normalized into 0  
557 to 1 as spanning between respective mean firing rates during spontaneous activity and singing (0-3s after song onset)  
558 to remove any bias among channels to obtain the general trend of onset- and offset-related firing across channels  
559 and birds.

560 The significance of activity elevation during pre-song, song, and post-song periods from the spontaneous activity  
561 level was tested by Wilcoxon signed-rank test with significant level at 0.05 after Bonferroni correction for multiple  
562 comparison.

563



564 Onset of pre-song and offset of post-song activity were estimated for each channel as the smoothed spike rate  
565 trajectory was exceeded a threshold which was defined as mean + 2 SD of the spontaneous spike rate.

566  
567

568 Single-unit and multiunit recordings of RA neurons were collected from six adult (>140 days old) male Bengalese  
569 finches as described previously<sup>66</sup>. All procedures were approved by the Emory University Institutional Animal Care  
570 and Use Committee. Briefly, an array of four or five high-impedance microelectrodes was implanted above RA. We  
571 advanced the electrodes through RA using a miniaturized microdrive to record extracellular voltage traces as birds  
572 produced undirected song (i.e., no female bird was present). We used a previously described spike sorting algorithm  
573 to classify individual recordings as single-unit or multiunit<sup>67</sup>. In total, we recorded 19 single units (multiunit  
574 recordings were not analyzed further in this study). Based on the spike waveforms and response properties of the  
575 recordings, all RA recordings were classified as putative projection neurons<sup>67-69</sup>.

576

### 577 **Analysis of Chronic Recording Data**

578 To analyze the variation in inter-spike-interval (ISI) in different time periods (Figure 5), we restricted our analysis to  
579 cases in which we collected at least one recording that included the relevant song epoch. “Spontaneous” epochs  
580 were sampled from neural activity recorded more than 10 sec after the nearest song bout. “Pre-song” activity was  
581 sampled from between 2.5 and 0.5 s prior to the first song syllable or introductory note. “Song” activity was sampled  
582 from the onset of the first song syllable until the offset of the last syllable in a bout. “Post-song” activity was sampled  
583 from between 0.5 and 2.5 s after the offset of the last syllable in a bout. In some cases, we did not have sufficient  
584 data available from all epochs for all neurons (note the variation in the number of neurons included in the analyses  
585 shown in Fig. 5d).

586

587

### 588 **Air Sac Recording Procedures**

589 Subsyringeal air pressure was recorded from six birds in directed singing conditions. Directed song was defined as a  
590 female presented in an adjacent cage during a two-hour recording period. Data from four of the birds were re-  
591 analyzed from a previously published study (Cooper & Goller, 2006) and data from two additional birds were  
592 collected to replicate the effects observed in the previously collected data<sup>70</sup>. As described in (Secora et al. 2004),  
593 each bird was accustomed to carrying a pressure transducer that was held in place on the bird’s back with an elastic  
594 band<sup>71</sup>. To facilitate relatively free lateral and vertical movement in the cage, the weight of the transducer was offset  
595 by a counter-balance arm. Subsyringeal air pressure surgery was performed after birds sang while carrying the  
596 pressure transducer. Prior to insertion of the air pressure cannula, animals were deeply anesthetized as verified by  
597 an absence of a toe-pinch response. A small opening in the body wall below the last rib was made with a fine pair of

598 micro-dissecting forceps, and a flexible cannula (silastic tubing, OD 1.65 mm, 6.5 cm length) was inserted into the  
599 body wall and suture was tied around the cannula and routed between the 2<sup>nd</sup> and 3<sup>rd</sup> ribs to hold it in place. The  
500 skin was sealed to the cannula with tissue adhesive. The free end of the cannula was attached to the pressure  
501 transducer. This allowed for measurement of relative subsyringeal air pressure changes inside the thoracic air sac  
502 before, during, and after spontaneously generated song events. Birds were monitored following surgery until they  
503 perched in the recording chamber.

504

505 The voltage output of the pressure transducer was amplified (50-100 x) and low-pass filtered (3 kHz cutoff; Brownlee,  
506 Model 440, Neurophase, Santa Clara, CA). Respiration was recorded for five seconds prior to and following singing  
507 epochs using a National Instruments analog-to-digital conversion board (NI USB 6251, Austin, TX) controlled by  
508 Avisoft Recorder software (Avisoft Bioacoustics, Berlin, Germany). Data were collected in wav file format, 16 bit  
509 resolution, with sampling rates varying from 22.05 to 40 kHz. Songs were selected for analysis that contained at least  
510 3 s of uninterrupted quiet respiration prior to and following song. Songs that were preceded by calls, drinking,  
511 defecation, or movement-related activity were excluded from the analysis.

512

### 513 **Air sac data classification**

514 Air pressure was analyzed as respiratory cycles, which was defined as an inspiration followed by expiration. The  
515 onset of inspiration was identified as subambient air pressurization and the return to ambient pressure following the  
516 expiratory phase of the cycle. The cycle duration (s), duty cycle (% time spent in the expiratory phase of respiration),  
517 and average rectified amplitude (a.u.) was calculated for each cycle. Song respiration was analyzed prior to song  
518 onset and following song termination. Song onset was defined as the inspiration preceding the first introductory  
519 note; using this marker, the onset time for each respiratory cycle in the pre-song recording period was determined.  
520 The conclusion of song was defined as the termination of the expiration generating the last song syllable in the bird's  
521 song bout. The timing of the respiratory cycles following song were identified relative to the song termination  
522 marker.

523

### 524 **Statistical analyses of respiratory data**

525 For statistical analyses of the respiratory data, each bird contributed a single average value for each measured  
526 parameter (cycle duration, duty cycle, average amplitude). A repeated measures ANOVA was used to determine how  
527 respiration changes prior to and following song. For each bird, ten to twenty songs were identified for the statistical  
528 analysis (see above for criteria). The average for the pre- and post-song (3-5s) for each measured parameter for each  
529 bird was calculated. To evaluate the time course of change in respiratory patterns preceding and following song, the  
530 average for one second bins for each bird were used in the repeated measures ANOVA. In cases where the  
531 assumption of sphericity was violated, the Greenhouse-Geisser correction for the *degrees of freedom* was used. All *p*

532 values reported are based on this correction. An *a priori* alpha level of .05 was used for determining statistical  
533 significance.

534

535

- 536 1 Hahnloser, R., Kozhevnikov, A. & Fee, M. An ultra-sparse code underlies the generation of neural  
537 sequences in a songbird. *Nature* **419**, 65-70 (2002).
- 538 2 Fee, M. S., Kozhevnikov, A. A. & Hahnloser, R. H. Neural mechanisms of vocal sequence  
539 generation in the songbird. *Ann N Y Acad Sci* **1016**, 153-170 (2004).
- 540 3 Peters, A. J., Chen, S. X. & Komiyama, T. Emergence of reproducible spatiotemporal activity  
541 during motor learning. *Nature* **510**, 263-267, doi:10.1038/nature13235 (2014).
- 542 4 Markowitz, J. E. *et al.* Mesoscopic patterns of neural activity support songbird cortical  
543 sequences. *PLoS Biol* **13**, e1002158, doi:10.1371/journal.pbio.1002158 (2015).
- 544 5 Okubo, T. S., Mackevicius, E. L., Payne, H. L., Lynch, G. F. & Fee, M. S. Growth and splitting of  
545 neural sequences in songbird vocal development. *Nature* **528**, 352-357,  
546 doi:10.1038/nature15741 (2015).
- 547 6 Lynch, G. F., Okubo, T. S., Hanuschkin, A., Hahnloser, R. H. & Fee, M. S. Rhythmic Continuous-  
548 Time Coding in the Songbird Analog of Vocal Motor Cortex. *Neuron* **90**, 877-892,  
549 doi:10.1016/j.neuron.2016.04.021 (2016).
- 550 7 Li, N., Chen, T. W., Guo, Z. V., Gerfen, C. R. & Svoboda, K. A motor cortex circuit for motor  
551 planning and movement. *Nature* **519**, 51-56, doi:10.1038/nature14178 (2015).
- 552 8 Svoboda, K. & Li, N. Neural mechanisms of movement planning: motor cortex and beyond. *Curr*  
553 *Opin Neurobiol* **49**, 33-41, doi:10.1016/j.conb.2017.10.023 (2017).
- 554 9 Rajan, K., Harvey, C. D. & Tank, D. W. Recurrent Network Models of Sequence Generation and  
555 Memory. *Neuron* **90**, 128-142, doi:10.1016/j.neuron.2016.02.009 (2016).
- 556 10 Fiete, I. R., Senn, W., Wang, C. Z. & Hahnloser, R. H. Spike-time-dependent plasticity and  
557 heterosynaptic competition organize networks to produce long scale-free sequences of neural  
558 activity. *Neuron* **65**, 563-576, doi:10.1016/j.neuron.2010.02.003 (2010).
- 559 11 Dragoi, G. & Buzsaki, G. Temporal encoding of place sequences by hippocampal cell assemblies.  
560 *Neuron* **50**, 145-157, doi:10.1016/j.neuron.2006.02.023 (2006).
- 561 12 Foster, D. J. & Wilson, M. A. Reverse replay of behavioural sequences in hippocampal place cells  
562 during the awake state. *Nature* **440**, 680-683, doi:10.1038/nature04587 (2006).
- 563 13 Schwartz, A. B. & Moran, D. W. Motor cortical activity during drawing movements: population  
564 representation during lemniscate tracing. *J Neurophysiol* **82**, 2705-2718,  
565 doi:10.1152/jn.1999.82.5.2705 (1999).
- 566 14 Luczak, A., Bartho, P., Marguet, S. L., Buzsaki, G. & Harris, K. D. Sequential structure of  
567 neocortical spontaneous activity in vivo. *Proc Natl Acad Sci U S A* **104**, 347-352,  
568 doi:10.1073/pnas.0605643104 (2007).
- 569 15 Pfeiffer, B. E. & Foster, D. J. Hippocampal place-cell sequences depict future paths to  
570 remembered goals. *Nature* **497**, 74-79, doi:10.1038/nature12112 (2013).
- 571 16 Pfeiffer, B. E. & Foster, D. J. PLACE CELLS. Autoassociative dynamics in the generation of  
572 sequences of hippocampal place cells. *Science* **349**, 180-183, doi:10.1126/science.aaa9633  
573 (2015).
- 574 17 Barnes, T. D., Kubota, Y., Hu, D., Jin, D. Z. & Graybiel, A. M. Activity of striatal neurons reflects  
575 dynamic encoding and recoding of procedural memories. *Nature* **437**, 1158-1161,  
576 doi:10.1038/nature04053 (2005).
- 577 18 Jin, D. Z., Fujii, N. & Graybiel, A. M. Neural representation of time in cortico-basal ganglia  
578 circuits. *Proc Natl Acad Sci U S A* **106**, 19156-19161, doi:10.1073/pnas.0909881106 (2009).

- 579 19 Mauk, M. D. & Buonomano, D. V. The neural basis of temporal processing. *Annu Rev Neurosci* **27**,  
580 307-340, doi:10.1146/annurev.neuro.27.070203.144247 (2004).
- 581 20 Harvey, C. D., Coen, P. & Tank, D. W. Choice-specific sequences in parietal cortex during a  
582 virtual-navigation decision task. *Nature* **484**, 62-68, doi:10.1038/nature10918 (2012).
- 583 21 Churchland, M. M. *et al.* Stimulus onset quenches neural variability: a widespread cortical  
584 phenomenon. *Nat Neurosci* **13**, 369-378, doi:10.1038/nn.2501 (2010).
- 585 22 Fiete, I. R., Hahnloser, R. H., Fee, M. S. & Seung, H. S. Temporal sparseness of the premotor drive  
586 is important for rapid learning in a neural network model of birdsong. *J Neurophysiol* **92**, 2274-  
587 2282 (2004).
- 588 23 Kumar, A., Rotter, S. & Aertsen, A. Spiking activity propagation in neuronal networks:  
589 reconciling different perspectives on neural coding. *Nat Rev Neurosci* **11**, 615-627,  
590 doi:10.1038/nrn2886 (2010).
- 591 24 Haga, T. & Fukai, T. Recurrent network model for learning goal-directed sequences through  
592 reverse replay. *eLife* **7**, doi:10.7554/eLife.34171 (2018).
- 593 25 Scharff, C., Kirn, J. R., Grossman, M., Macklis, J. D. & Nottebohm, F. Targeted neuronal death  
594 affects neuronal replacement and vocal behavior in adult songbirds. *Neuron* **25**, 481-492  
595 (2000).
- 596 26 Long, M. A. & Fee, M. S. Using temperature to analyse temporal dynamics in the songbird motor  
597 pathway. *Nature* **456**, 189-194 (2008).
- 598 27 Long, M. A., Jin, D. Z. & Fee, M. S. Support for a synaptic chain model of neuronal sequence  
599 generation. *Nature* **468**, 394-399, doi:10.1038/nature09514 (2010).
- 700 28 Kozhevnikov, A. A. & Fee, M. S. Singing-related activity of identified HVC neurons in the zebra  
701 finch. *J Neurophysiol* **97**, 4271-4283 (2007).
- 702 29 Hamaguchi, K., Tanaka, M. & Mooney, R. A Distributed Recurrent Network Contributes to  
703 Temporally Precise Vocalizations. *Neuron* **91**, 680-693, doi:10.1016/j.neuron.2016.06.019  
704 (2016).
- 705 30 Churchland, M. M., Cunningham, J. P., Kaufman, M. T., Ryu, S. I. & Shenoy, K. V. Cortical  
706 preparatory activity: representation of movement or first cog in a dynamical machine? *Neuron*  
707 **68**, 387-400, doi:10.1016/j.neuron.2010.09.015 (2010).
- 708 31 Schmidt, M. F. & Goller, F. Breathtaking Songs: Coordinating the Neural Circuits for Breathing  
709 and Singing. *Physiology (Bethesda)* **31**, 442-451, doi:10.1152/physiol.00004.2016 (2016).
- 710 32 Ghosh, K. K. *et al.* Miniaturized integration of a fluorescence microscope. *Nat Methods* **8**, 871-  
711 878, doi:10.1038/nmeth.1694 (2011).
- 712 33 Chen, T. W. *et al.* Ultrasensitive fluorescent proteins for imaging neuronal activity. *Nature* **499**,  
713 295-300, doi:10.1038/nature12354 (2013).
- 714 34 Picardo, M. A. *et al.* Population-Level Representation of a Temporal Sequence Underlying Song  
715 Production in the Zebra Finch. *Neuron* **90**, 866-876, doi:10.1016/j.neuron.2016.02.016 (2016).
- 716 35 Amador, A., Perl, Y. S., Mindlin, G. B. & Margoliash, D. Elemental gesture dynamics are encoded  
717 by song premotor cortical neurons. *Nature* **495**, 59-64, doi:10.1038/nature11967 (2013).
- 718 36 Liberti, W. A., 3rd *et al.* Unstable neurons underlie a stable learned behavior. *Nat Neurosci* **19**,  
719 1665-1671, doi:10.1038/nn.4405 (2016).
- 720 37 Katlowitz, K. A., Picardo, M. A. & Long, M. A. Stable Sequential Activity Underlying the  
721 Maintenance of a Precisely Executed Skilled Behavior. *Neuron* **98**, 1133-1140 e1133,  
722 doi:10.1016/j.neuron.2018.05.017 (2018).
- 723 38 Roberts, T. F. *et al.* Identification of a motor-to-auditory pathway important for vocal learning.  
724 *Nat Neurosci*, doi:10.1038/nn.4563 (2017).
- 725 39 McCasland, J. S. Neuronal control of birdsong production. *Journal of Neuroscience* **7**, 23-39  
726 (1987).

- 727 40 Rajan, R. & Doupe, A. J. Behavioral and neural signatures of readiness to initiate a learned motor  
728 sequence. *Curr Biol* **23**, 87-93, doi:10.1016/j.cub.2012.11.040 (2013).
- 729 41 Rajan, R. Pre-Bout Neural Activity Changes in Premotor Nucleus HVC Correlate with Successful  
730 Initiation of Learned Song Sequence. *The Journal of Neuroscience* **38**, 5925-5938,  
731 doi:10.1523/jneurosci.3003-17.2018 (2018).
- 732 42 Williams, H. Birdsong and singing behavior. *Ann N Y Acad Sci* **1016**, 1-30 (2004).
- 733 43 Franz, M. & Goller, F. Respiratory patterns and oxygen consumption in singing zebra finches. *J*  
734 *Exp Biol* **206**, 967-978 (2003).
- 735 44 Okanoya, K. The Bengalese finch: a window on the behavioral neurobiology of birdsong syntax.  
736 *Ann N Y Acad Sci* **1016**, 724-735 (2004).
- 737 45 Mooney, R. & Prather, J. F. The HVC microcircuit: the synaptic basis for interactions between  
738 song motor and vocal plasticity pathways. *J Neurosci* **25**, 1952-1964 (2005).
- 739 46 Roberts, T. F. *et al.* Identification of a motor-to-auditory pathway important for vocal learning.  
740 *Nat Neurosci* **20**, 978-986, doi:10.1038/nn.4563 (2017).
- 741 47 Hartley, R. S. & Suthers, R. A. Airflow and pressure during canary song: direct evidence for mini-  
742 breaths. *Journal of Comparative Physiology A* **165**, 15-26, doi:10.1007/bf00613795 (1989).
- 743 48 Suthers, R. A., Goller, F. & Pytte, C. The neuromuscular control of birdsong. *Philos Trans R Soc*  
744 *Lond B Biol Sci* **354**, 927-939 (1999).
- 745 49 Wild, J. M. Descending projections of the songbird nucleus robustus archistriatalis. *Journal of*  
746 *Comparative Neurology* **338**, 225-241 (1993).
- 747 50 Andalman, A. S., Foerster, J. N. & Fee, M. S. Control of vocal and respiratory patterns in birdsong:  
748 dissection of forebrain and brainstem mechanisms using temperature. *PloS one* **6**, e25461,  
749 doi:10.1371/journal.pone.0025461 (2011).
- 750 51 Goller, F. & Cooper, B. G. Peripheral motor dynamics of song production in the zebra finch. *Ann*  
751 *N Y Acad Sci* **1016**, 130-152 (2004).
- 752 52 Sturdy, C. B., Wild, J. M. & Mooney, R. Respiratory and telencephalic modulation of vocal motor  
753 neurons in the zebra finch. *J Neurosci* **23**, 1072-1086 (2003).
- 754 53 Roberts, T. F., Klein, M. E., Kubke, M. F., Wild, J. M. & Mooney, R. Telencephalic neurons  
755 monosynaptically link brainstem and forebrain premotor networks necessary for song. *J*  
756 *Neurosci* **28**, 3479-3489 (2008).
- 757 54 Ashmore, R. C., Wild, J. M. & Schmidt, M. F. Brainstem and forebrain contributions to the  
758 generation of learned motor behaviors for song. *J Neurosci* **25**, 8543-8554 (2005).
- 759 55 Schmidt, M. F., McLean, J. & Goller, F. Breathing and vocal control: the respiratory system as  
760 both a driver and a target of telencephalic vocal motor circuits in songbirds. *Exp Physiol* **97**,  
761 455-461, doi:10.1113/expphysiol.2011.058669 (2012).
- 762 56 Danish, H. H., Aronov, D. & Fee, M. S. Rhythmic syllable-related activity in a songbird motor  
763 thalamic nucleus necessary for learned vocalizations. *PloS one* **12**, e0169568,  
764 doi:10.1371/journal.pone.0169568 (2017).
- 765 57 Vyssotski, A. L., Stepien, A. E., Keller, G. B. & Hahnloser, R. H. A Neural Code That Is Isometric to  
766 Vocal Output and Correlates with Its Sensory Consequences. *PLoS Biol* **14**, e2000317,  
767 doi:10.1371/journal.pbio.2000317 (2016).
- 768 58 Williams, H. & Vicario, D. S. Temporal patterning of song production: participation of nucleus  
769 uvaeformis of the thalamus. *Journal of Neurobiology* **24**, 903-912 (1993).
- 770 59 Shea, S. D., Koch, H., Baleckaitis, D., Ramirez, J. M. & Margoliash, D. Neuron-specific cholinergic  
771 modulation of a forebrain song control nucleus. *J Neurophysiol* **103**, 733-745,  
772 doi:10.1152/jn.00803.2009 (2010).
- 773 60 Shea, S. D. & Margoliash, D. Basal forebrain cholinergic modulation of auditory activity in the  
774 zebra finch song system. *Neuron* **40**, 1213-1226 (2003).



- 775 61 Li, R. & Sakaguchi, H. Cholinergic innervation of the song control nuclei by the ventral  
776 paleostriatum in the zebra finch: a double-labeling study with retrograde fluorescent tracers  
777 and choline acetyltransferase immunohistochemistry. *Brain Res* **763**, 239-246 (1997).
- 778 62 Appeltants, D., Absil, P., Balthazart, J. & Ball, G. F. Identification of the origin of  
779 catecholaminergic inputs to HVC in canaries by retrograde tract tracing combined with tyrosine  
780 hydroxylase immunocytochemistry. *J Chem Neuroanat* **18**, 117-133 (2000).
- 781 63 Hamaguchi, K. & Mooney, R. Recurrent interactions between the input and output of a songbird  
782 cortico-basal ganglia pathway are implicated in vocal sequence variability. *J Neurosci* **32**,  
783 11671-11687, doi:10.1523/JNEUROSCI.1666-12.2012 (2012).
- 784 64 Pnevmatikakis, Eftychios A. *et al.* Simultaneous Denoising, Deconvolution, and Demixing of  
785 Calcium Imaging Data. *Neuron* **89**, 285-299, doi:10.1016/j.neuron.2015.11.037 (2016).
- 786 65 Friedrich, J., Zhou, P. & Paninski, L. Fast online deconvolution of calcium imaging data. *PLoS*  
787 *Computational Biology* **13**, e1005423, doi:10.1371/journal.pcbi.1005423 (2017).
- 788 66 Tang, C., Chehayeb, D., Srivastava, K., Nemenman, I. & Sober, S. J. Millisecond-scale motor  
789 encoding in a cortical vocal area. *PLoS Biol* **12**, e1002018, doi:10.1371/journal.pbio.1002018  
790 (2014).
- 791 67 Sober, S. J., Wohlgemuth, M. J. & Brainard, M. S. Central contributions to acoustic variation in  
792 birdsong. *Journal of Neuroscience* **28**, 10370-10379, doi:10.1523/JNEUROSCI.2448-08.2008  
793 (2008).
- 794 68 Leonardo, A. & Fee, M. S. Ensemble coding of vocal control in birdsong. *J Neurosci* **25**, 652-661  
795 (2005).
- 796 69 Spiro, J., Dalva, M. & Mooney, R. Long-range inhibition within the zebra finch song nucleus RA  
797 can coordinate the firing of multiple projection neurons. *Journal of Neurophysiology* **81**, 3007-  
798 3020 (1999).
- 799 70 Cooper, B. G. & Goller, F. Physiological insights into the social-context-dependent changes in the  
300 rhythm of the song motor program. *J Neurophysiol* **95**, 3798-3809 (2006).
- 301 71 Secora, K. R. *et al.* Syringeal specialization of frequency control during song production in the  
302 Bengalese finch (*Lonchura striata domestica*). *PloS one* **7**, e34135,  
303 doi:10.1371/journal.pone.0034135 (2012).  
304
